# Supplementary material for: Amorphous Cu-added/SnOx/CNFs composite webs as anode materials with superior lithium-ion storage capability
Source: Royal Society of Chemistry journal article supplement (doi:10.1039/c5ra03658e), 2015-01-01
Supplement: c5ra03658e1.pdf [file c5ra03658e1.pdf]

## Supporting Information”

**Cheng Chi<sup>a</sup>, Jinle Lan<sup>a,b</sup>, Yuan Liu<sup>a</sup>, Jiangman Sun<sup>a</sup>, Yunhua Yu<sup>a,b,\*</sup>, Xiaoping Yang<sup>a,b</sup>**

<sup>a</sup> *State Key Laboratory of Organic-Inorganic Composites, Beijing University of Chemical Technology, Beijing 100029, China*

<sup>b</sup> *Changzhou Institute of Advanced Materials, Beijing University of Chemical Technology, Beijing 100029, China*

\* Corresponding author. Tel. /Fax: +8610-6442-7698/2084

*E-mail address:* [yuyh@mail.buct.edu.cn](mailto:yuyh@mail.buct.edu.cn)

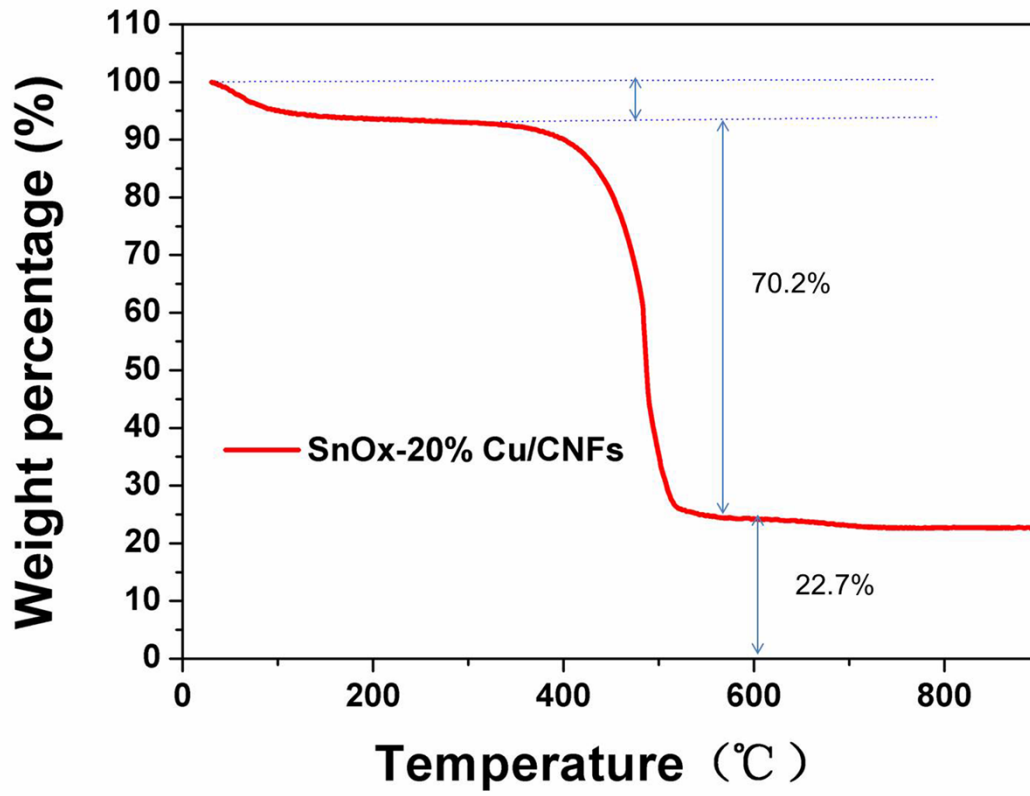

Figure S1. TGA analysis of SnO<sub>x</sub>-20%Cu/CNFs.

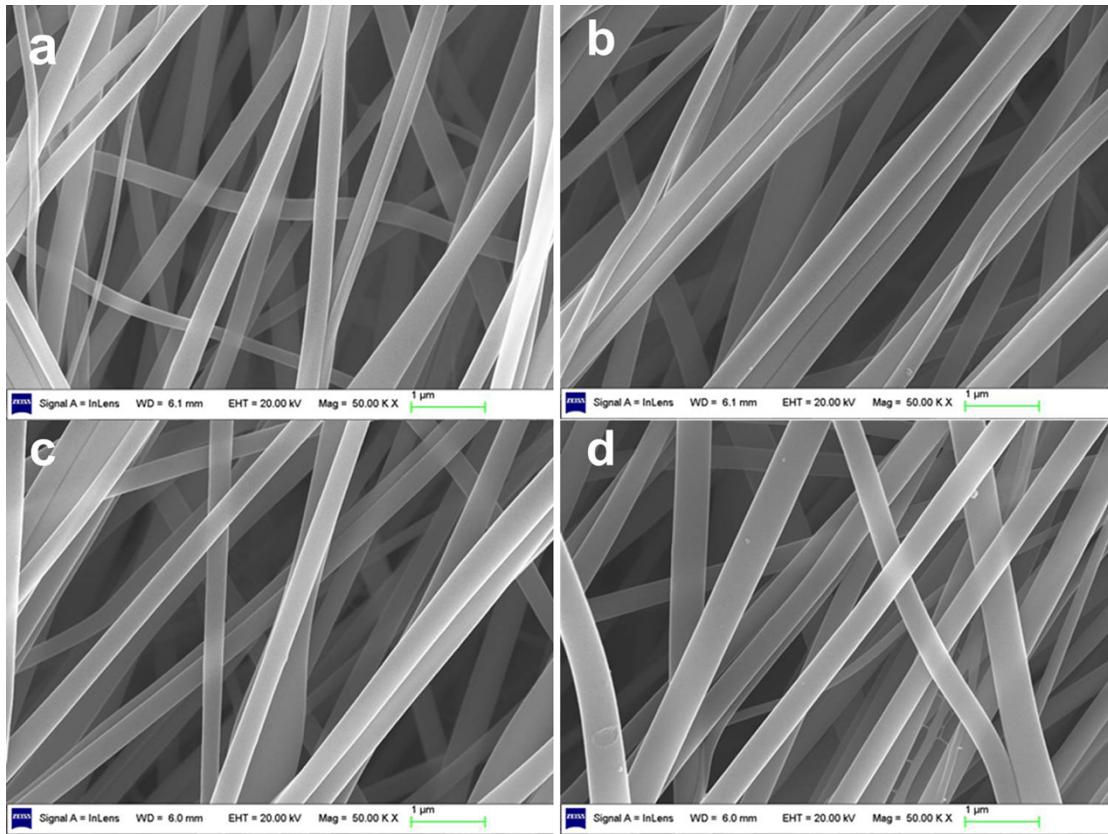

**Figure S2.** SEM images of (a) SnO<sub>x</sub>/CNFs; (b) SnO<sub>x</sub>-10%Cu/CNFs; (c) SnO<sub>x</sub>-20%Cu/CNFs; (d) SnO<sub>x</sub>-30%Cu/CNFs.

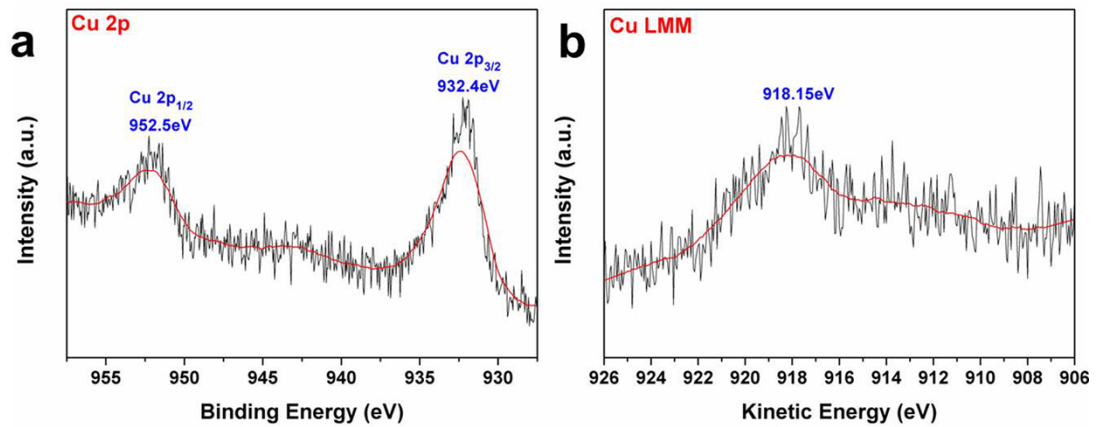

**Figure S3.** (a) XPS high-resolution spectra of Cu 2p regions of SnO<sub>x</sub>-20%Cu/CNFs; (b) AES Spectra of Cu LMM Auger electron of SnO<sub>x</sub>-20%Cu/CNF when discharged to 0V in the first cycle.
